# Supplementary material
Source: publisher figshare collection journal article supplement (https://acs.figshare.com/ndownloader/files/4760458)
Supplement: Supplementary file 1 [file 4760458]

## Supporting Information

# Synthesis of New Dirhodium(II) Complexes with Several Cyclometalated Thienylphosphines

*Julio Lloret,<sup>[a]</sup> Francisco Estevan,<sup>[a]</sup> Pascual Lahuerta,\*<sup>[a]</sup> Pipsa Hirva,<sup>[b]</sup> Julia Pérez-Prieto,\*<sup>[c]</sup> and Mercedes Sanaú<sup>[a]</sup>*

**S4: Figure S1.** Left: ORTEP for compound **5BB**.**CH<sub>3</sub>CO<sub>2</sub>H** with ellipsoids representing 30% of probability. Right: selected view of crystal packing for compound **5BB**.**CH<sub>3</sub>CO<sub>2</sub>H** (H atoms omitted for clarity). Selected bond distances (Å) and angles (°) are: Rh(1)-Rh(2), 2.4985(8); Rh(1)-P(1), 2.215(14); Rh(2)-C(1), 1.98(5); Rh(1)-O(1), 2.186(4); Rh(2)-O(2), 2.155(4); O(2)-O(4), 2.623(4); O(1)-O(5), 2.707(5); P(1)-Rh(1)-Rh(2), 90.11(4); Rh(1)-Rh(2)-C(1), 94.62(16).

**S5: Figure S2.** Left: ORTEP for compound **7A**.**CH<sub>3</sub>CO<sub>2</sub>H** with ellipsoids representing 30% of probability (H atoms omitted for clarity). Selected bond distances (Å) and angles (°): Rh(1)-Rh(2), 2.4361(12); Rh(1)-P(1), 2.212(3); Rh(2)-C(2), 1.988(9); Rh(1)-Oax, 2.396(8); Rh(2)-Oax, 2.2283(7); P(1)-Rh(1)-Rh(2), 91.60(8); Rh(1)-Rh(2)-C(2), 96.0(3).

Right: ORTEP for 2·CH<sub>3</sub>COOH solvent molecules in the lattice of X-ray for compound **7A·CH<sub>3</sub>CO<sub>2</sub>H** with ellipsoids representing 30% of probability and H atoms omitted for clarity. Selected bond distances (Å) are: O(11)-O(13), 2.69(1); O(11)-C(27), 1.29(1); O(12)-C(27), 1.22(1).

**S6: Figure S3.** ORTEP for compound **10AA·(py)<sub>2</sub>** with ellipsoids representing 30% of probability and H atoms omitted for clarity. Selected bond distances (Å) and angles (°) are: Rh(1)-Rh(2), 2.598(6); Rh(1)-P(1), 2.2151(16); Rh(2)-C(2), 1.980(6); Rh(2)-Nax, 2.268(5); P(1)-Rh(1)-Rh(2), 88.35(7); Rh(1)-Rh(2)-C(1), 95.1(3).

**S7: Figure S4.** Left: ORTEP for compound **11AA·py·(H<sub>2</sub>O)<sub>0.5</sub>** with ellipsoids representing 30% of probability. Right: bridging of two molecules of **11AA·py** by H<sub>2</sub>O (H atoms omitted for clarity. Selected bond distances (Å) and angles (°) are: Rh(1)-Rh(2), 2.5268(7); Rh(1)-P(1), 2.2317(16); Rh(2)-C(1), 1.988(6); P(1)-Rh(1)-Rh(2), 88.44(7); Rh(1)-Rh(2)-C(1), 94.37(3).

**S8: Figure S5.** COSY NMR (400 MHz, CD<sub>3</sub>CO<sub>2</sub>D) of **7A**. Correlation between the protons within the thiophene ring (7.81(1H)-7.99(1H) ppm) and the protons within the phenyl rings (7.68(4H)-7.40(2H)-7.31(4H) ppm).

**S9: Figure S6.** HMBC <sup>31</sup>P-<sup>1</sup>H NMR (400 MHz, CD<sub>3</sub>CO<sub>2</sub>D) of **7A**. Correlation between the phosphorous and the phenyl protons in *ortho*-position (at 7.68 ppm).

**S10-S14: Evolution from 7A to 8 in CH<sub>3</sub>CO<sub>2</sub>H (CD<sub>3</sub>CO<sub>2</sub>D): Figure S7.** Selected <sup>31</sup>P{<sup>1</sup>H} NMR spectra of the evolution from **7A** to **8** in CH<sub>3</sub>CO<sub>2</sub>H. **Figure S8.** COSY NMR (400 MHz, CD<sub>3</sub>CO<sub>2</sub>D) spectrum from a 4:1 mixture of **7A/8**. The lines shows the <sup>1</sup>H-<sup>1</sup>H correlation for compound **8**. **Figure S9.** Selected <sup>1</sup>H NMR spectra of the evolution

from **7A** to **8** in  $\text{CD}_3\text{CO}_2\text{D}$  at  $70^\circ\text{C}$ . **Figure S10.** COSY NMR (400 MHz,  $\text{CD}_3\text{CO}_2\text{D}$ ) spectrum from a mixture of **7A/8** after H/D interchange in  $\text{CD}_3\text{CO}_2\text{D}$ . The lines show  $^1\text{H}$ - $^1\text{H}$  correlations for compound **8**. The signal at 7.51 is missing due to a total H/D exchange. **Figure S11.** Evolution from **7A** to **8** at  $70^\circ\text{C}$ : a) in d4-acetic acid( $\diamond$ ), b) in acetic acid ( $\circ$ ), c) in d4-acetic acid ( $\triangle$ ), but starting with a sample which had reached the equilibrium in acetic acid.

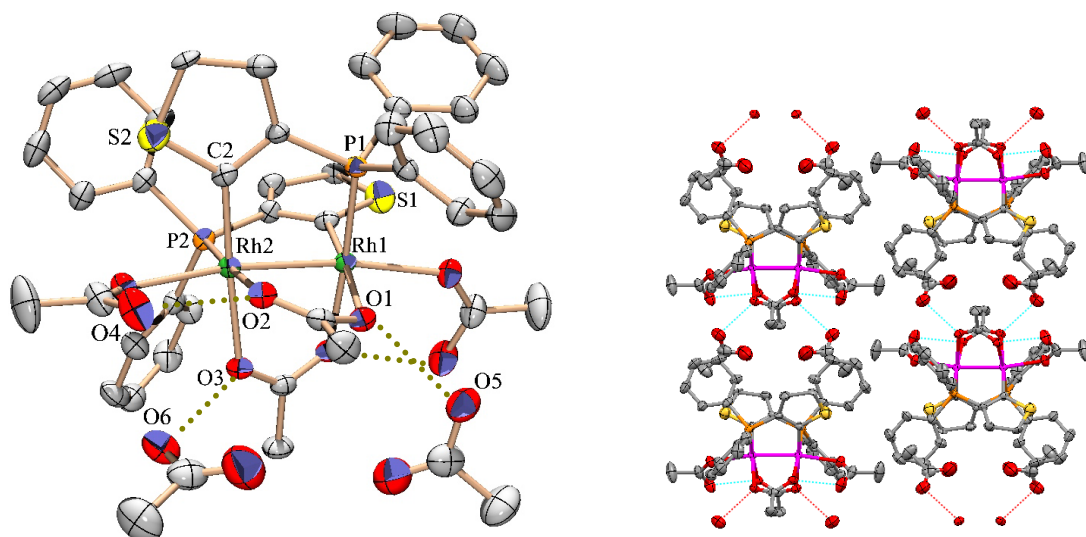

**Figure S1.** Left: ORTEP for compound **5BB.CH<sub>3</sub>CO<sub>2</sub>H** with ellipsoids representing 30% of probability. Right: selected view of crystal packing for compound **5BB.CH<sub>3</sub>CO<sub>2</sub>H** (H atoms omitted for clarity). Selected bond distances (Å) and angles (°) are: Rh(1)-Rh(2), 2.4985(8); Rh(1)-P(1), 2.215(14); Rh(2)-C(1), 1.98(5); Rh(1)-O(1), 2.186(4); Rh(2)-O(2), 2.155(4); O(2)-O(4), 2.623(4); O(1)-O(5), 2.707(5); P(1)-Rh(1)-Rh(2), 90.11(4); Rh(1)-Rh(2)-C(1), 94.62(16).

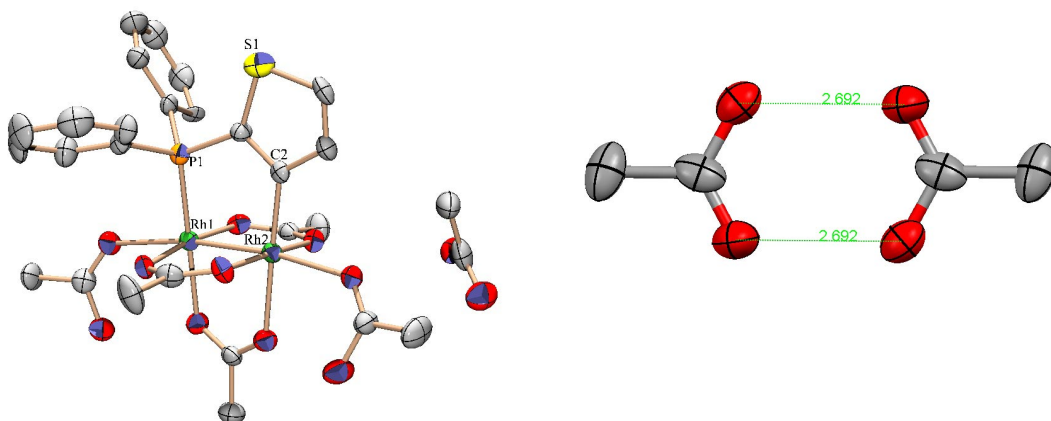

**Figure S2.** Left: ORTEP for compound **7A·CH<sub>3</sub>CO<sub>2</sub>H** with ellipsoids representing 30% of probability (H atoms omitted for clarity). Selected bond distances (Å) and angles (°): Rh(1)-Rh(2), 2.4361(12); Rh(1)-P(1), 2.212(3); Rh(2)-C(2), 1.988(9); Rh(1)-Oax, 2.396(8); Rh(2)-Oax, 2.2283(7); P(1)-Rh(1)-Rh(2), 91.60(8); Rh(1)-Rh(2)-C(2), 96.0(3). Right: ORTEP for 2·CH<sub>3</sub>COOH solvent molecules in the lattice of X-ray for compound **7A·CH<sub>3</sub>CO<sub>2</sub>H** with ellipsoids representing 30% of probability and H atoms omitted for clarity. Selected bond distances (Å) are: O(11)-O(13), 2.69(1); O(11)-C(27), 1.29(1); O(12)-C(27), 1.22(1).

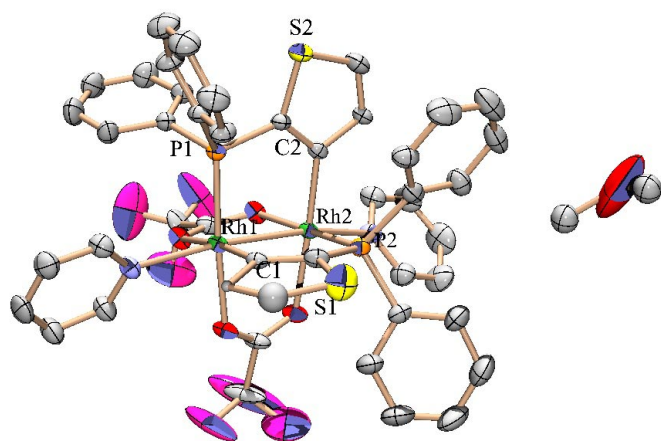

**Figure S3.** ORTEP for compound **10AA·(py)<sub>2</sub>** with ellipsoids representing 30% of probability and H atoms omitted for clarity. Selected bond distances (Å) and angles (°) are: Rh(1)-Rh(2), 2.598(6); Rh(1)-P(1), 2.2151(16); Rh(2)-C(2), 1.980(6); Rh(2)-Nax, 2.268(5); P(1)-Rh(1)-Rh(2), 88.35(7); Rh(1)-Rh(2)-C(1), 95.1(3).

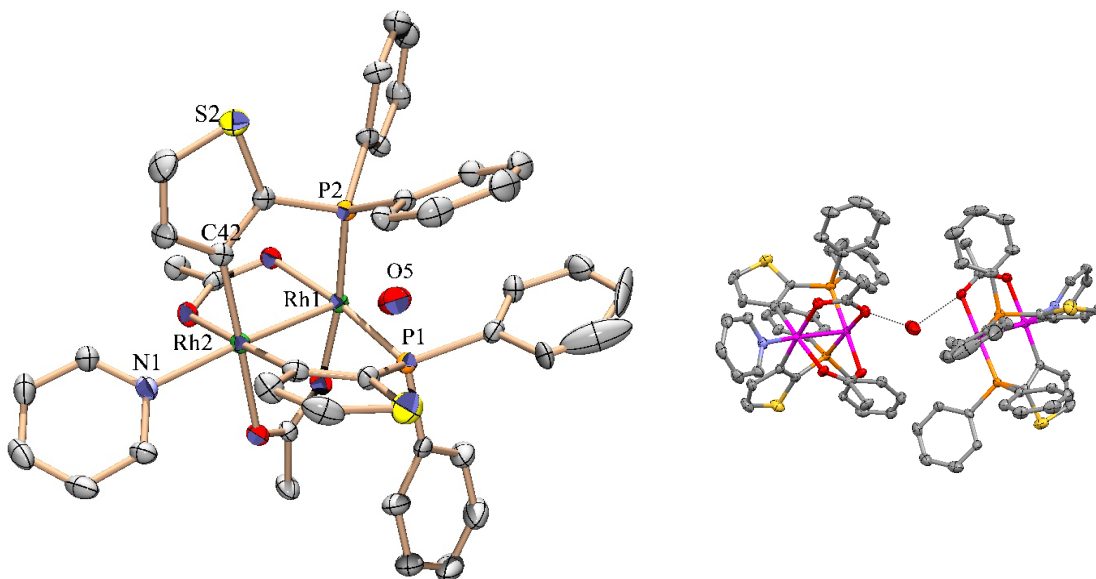

**Figure S4.** Left: ORTEP for compound **11AA·py(H<sub>2</sub>O)<sub>0.5</sub>** with ellipsoids representing 30% of probability. Right: bridging of two molecules of **11AA·py** by H<sub>2</sub>O (H atoms omitted for clarity). Selected bond distances (Å) and angles (°) are: Rh(1)-Rh(2), 2.5268(7); Rh(1)-P(1), 2.2317(16); Rh(2)-C(1), 1.988(6); P(1)-Rh(1)-Rh(2), 88.44(7); Rh(1)-Rh(2)-C(1), 94.37(3).

**Characterization of the mono-cyclometalated compound 7A.**

2D NMR, COSY and HMBC  $^{31}\text{P}$ - $^1\text{H}$  for compound **7A**.

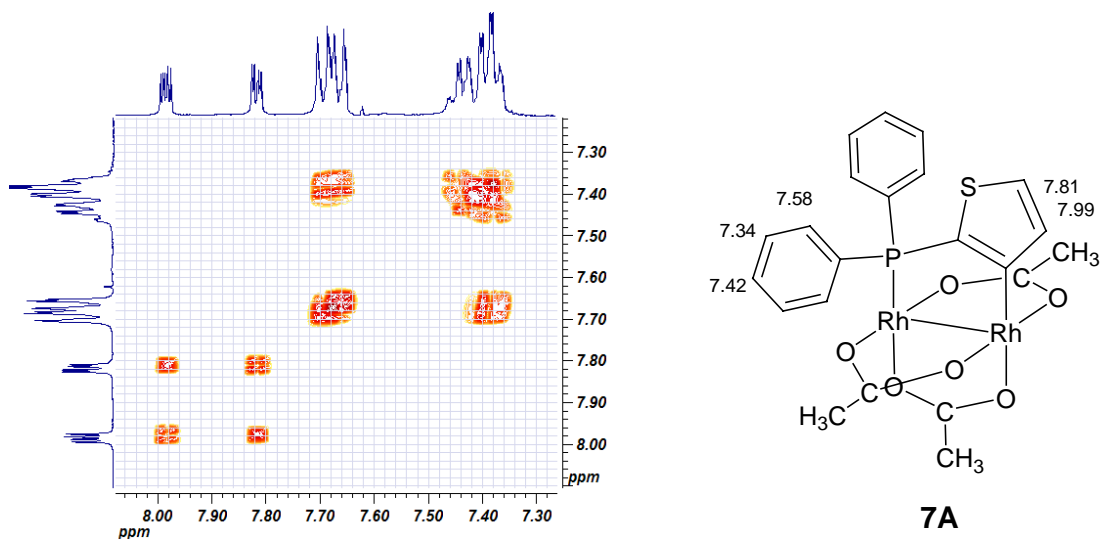

**Figure S5.** COSY NMR (400 MHz,  $\text{CD}_3\text{CO}_2\text{D}$ ) of **7A**. Correlation between the protons within the thiophene ring (7.81(1H)-7.99(1H) ppm) and the protons within the phenyl rings (7.68(4H)-7.40(2H)-7.31(4H) ppm).



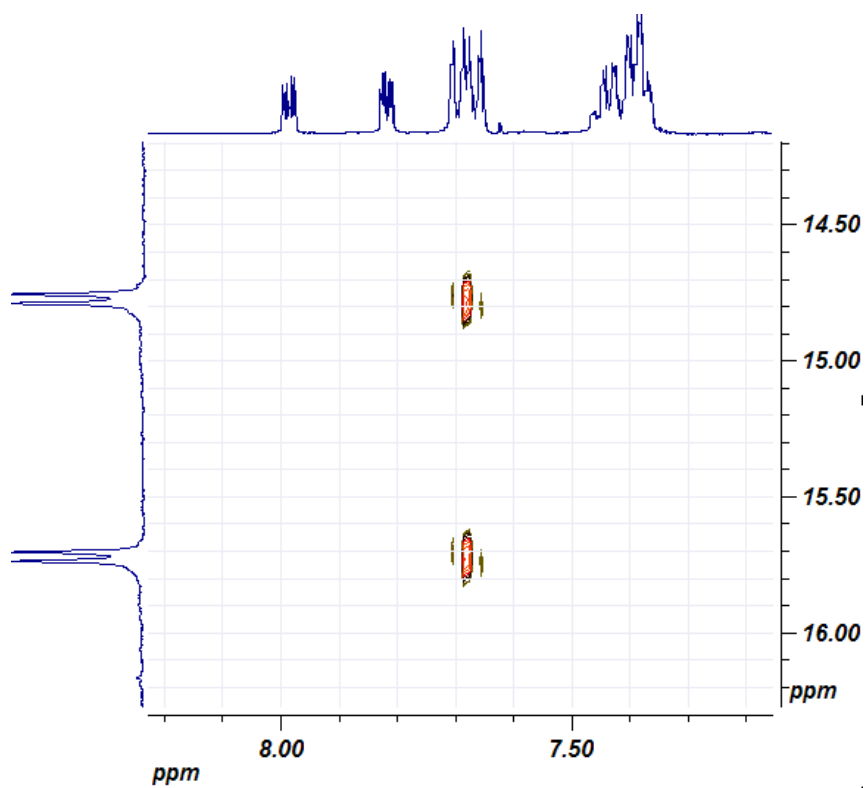

**Figure S6.** HMBC  $^{31}\text{P}$ - $^1\text{H}$  NMR (400 MHz,  $\text{CD}_3\text{CO}_2\text{D}$ ) of **7A**. Correlation between the phosphorous and the phenyl protons in *ortho*-position (at 7.68 ppm).

Evolution from **7A** to **8** in CH<sub>3</sub>CO<sub>2</sub>H (CD<sub>3</sub>CO<sub>2</sub>D)

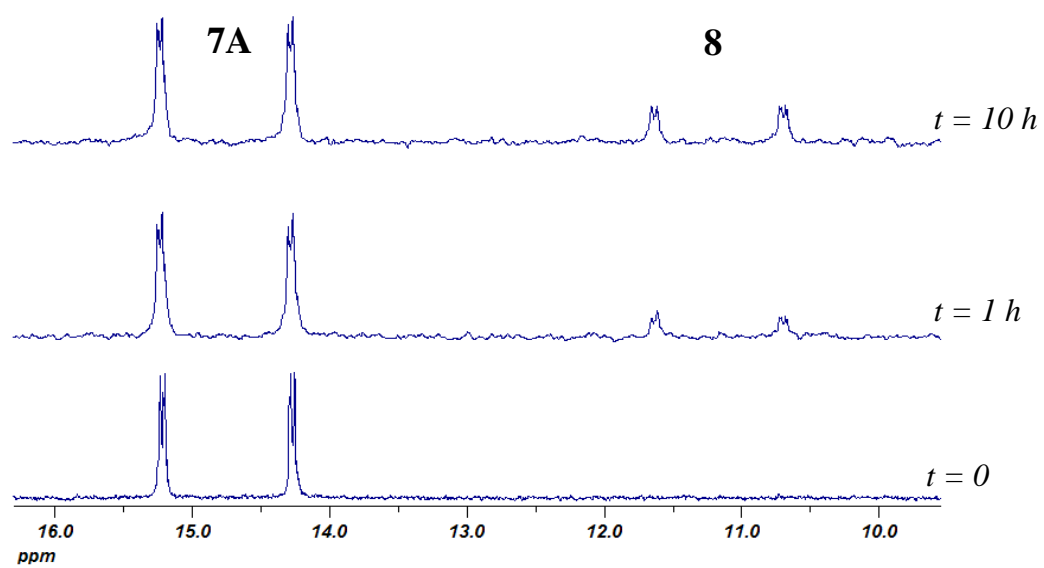

**Figure S7.** Selected <sup>31</sup>P{<sup>1</sup>H} NMR spectra of the evolution from **7A** to **8** in CH<sub>3</sub>CO<sub>2</sub>H.

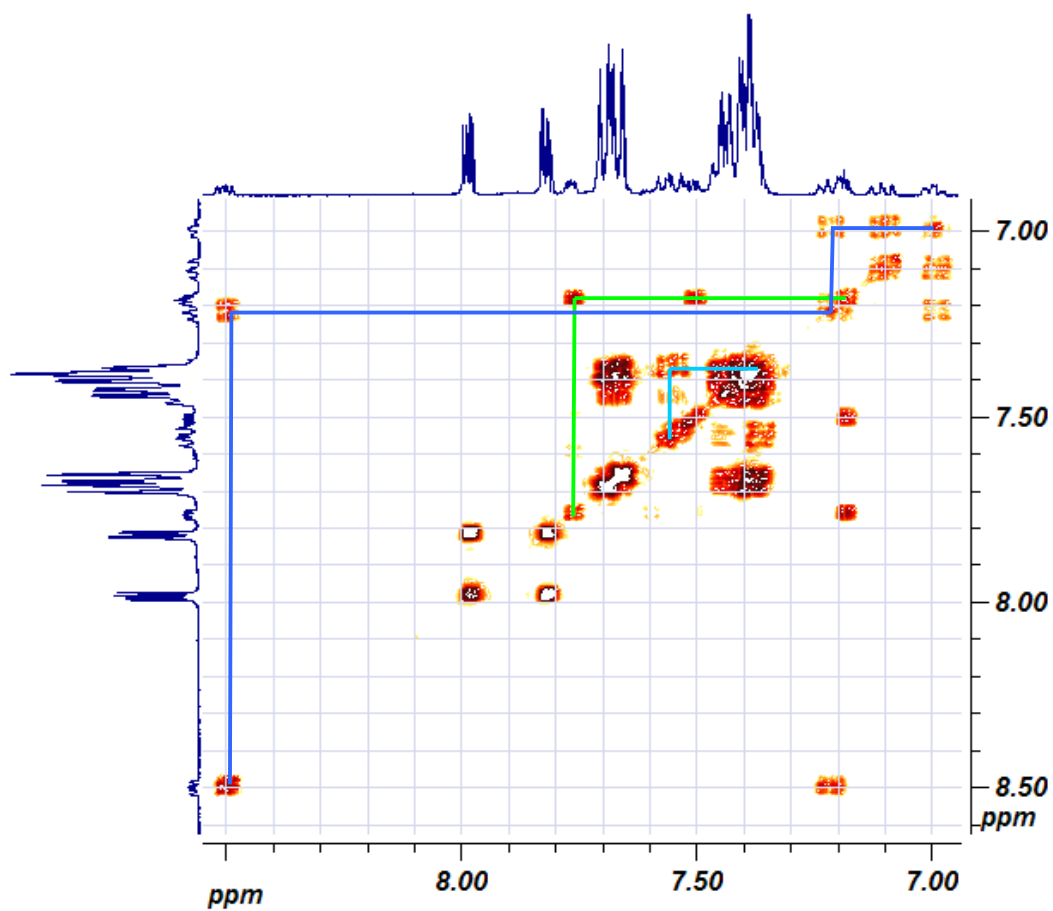

**Figure S8.** COSY NMR (400 MHz, CD<sub>3</sub>CO<sub>2</sub>D) spectrum from a 4:1 mixture of **7A**/**8**.

The lines shows the <sup>1</sup>H-<sup>1</sup>H correlation for compound **8**.

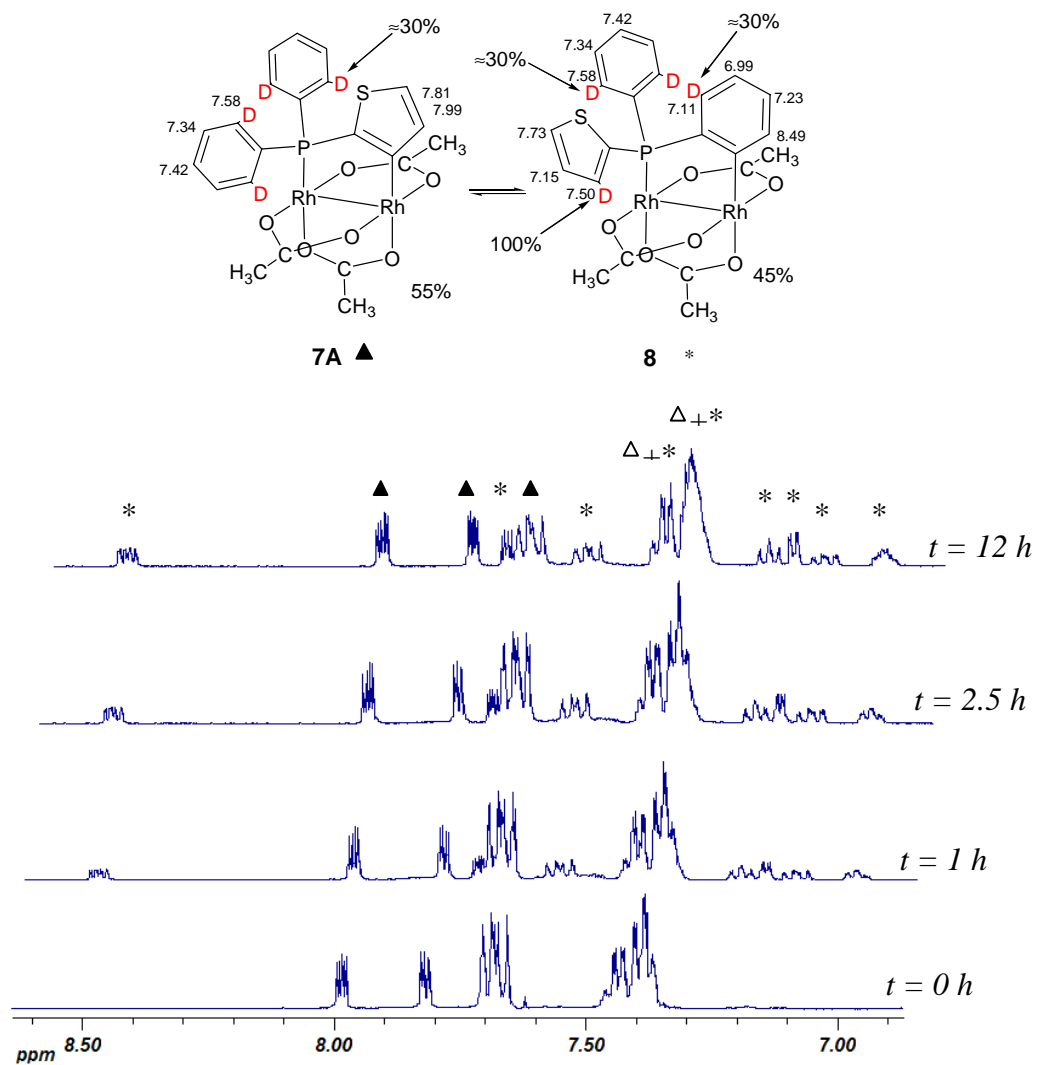

**Figure S9.** Selected  $^1\text{H}$  NMR spectra of the evolution from **7A** to **8** in  $\text{CD}_3\text{CO}_2\text{D}$  at  $70^\circ\text{C}$ .

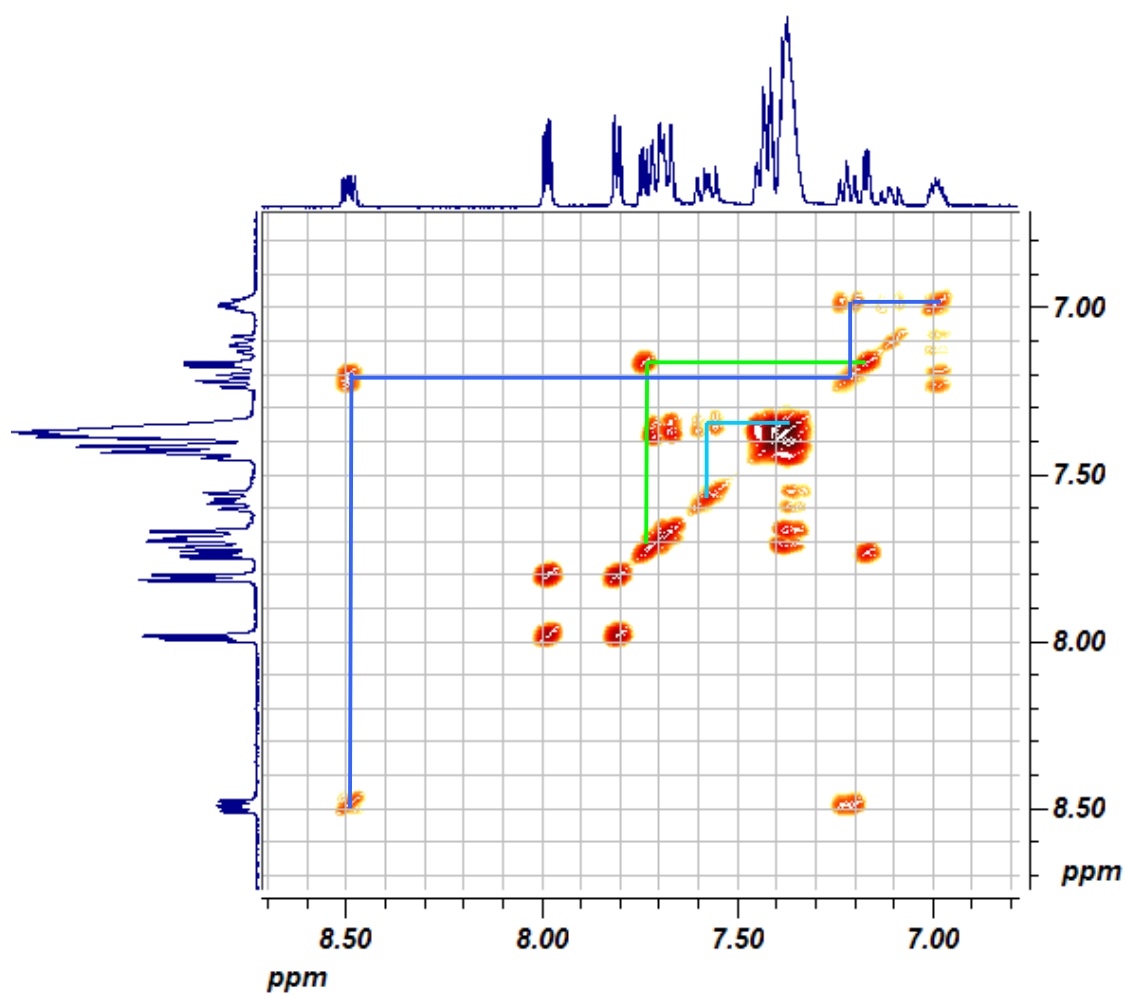

**Figure S10.** COSY NMR (400 MHz, CD<sub>3</sub>CO<sub>2</sub>D) spectrum from a mixture of **7A/8** after H/D interchange in CD<sub>3</sub>CO<sub>2</sub>D. The lines show <sup>1</sup>H-<sup>1</sup>H correlations for compound **8**. The signal at 7.51 is missing due to a total H/D exchange.

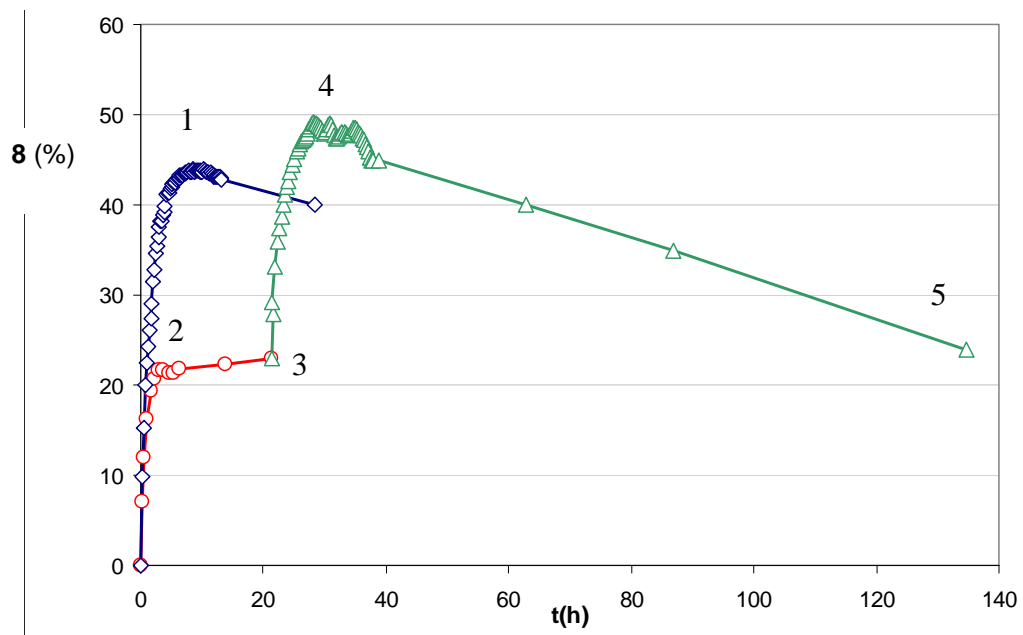

**Figure S11.** Evolution from **7A** to **8** at 70 °C: a) in d4-acetic acid( $\diamond$ ), b) in acetic acid ( $\circ$ ), c) in d4-acetic acid ( $\triangle$ ), but starting with a sample which had reached the equilibrium in acetic acid.
